# Supplementary material
Source: Springer Nature journal article supplement (https://www.springermedizin.de/resource/supplementary/12958_2006_313_MOESM8_ESM.pdf/9567602)

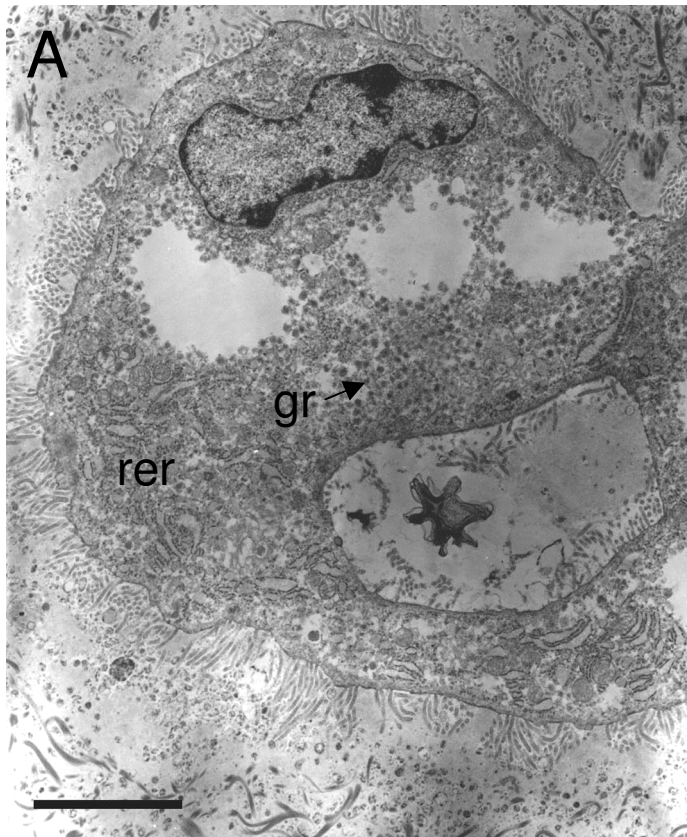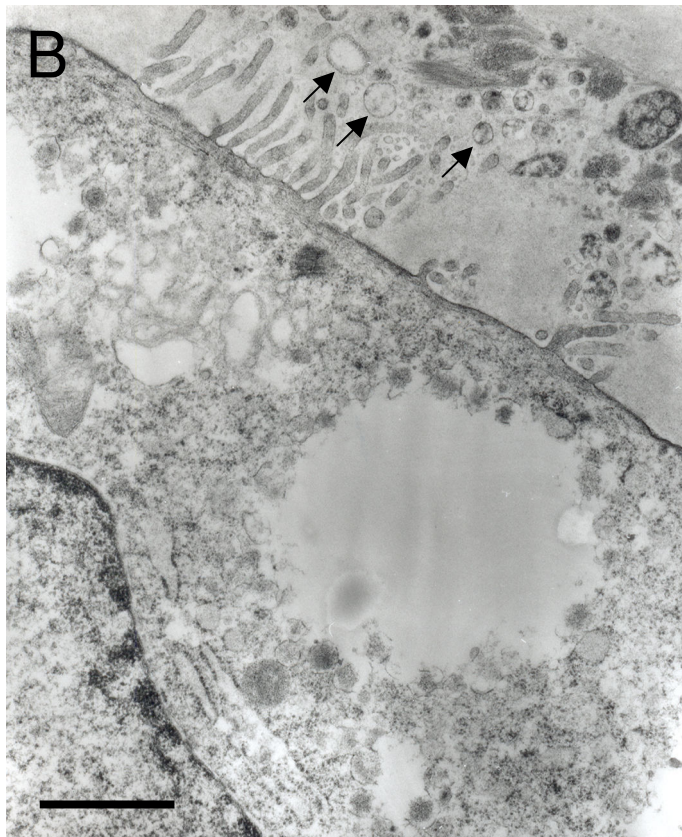

Supplement: MOESM8 [file 9567602]
